# Supplementary material for: An Expanded Interplay Network between NF-κB p65 (RelA) and E2F1 Transcription Factors: Roles in Physiology and Pathology
Source: MDPI journal article supplement (doi:10.3390/cancers14205047), 2022-10-14

**Figure S1:** IGV screenshots (A) p65-specific peaks at the NFKB1A locus. (B) E2F1-specific and HeLa-specific peak at the CCNA2 locus. (C) p65-E2F1 peak at the Stat1 locus. (D) p65-E2F1 HeLa specific peak at the OAS3 locus. (E) p65, E2F1 peaks at the Myc locus

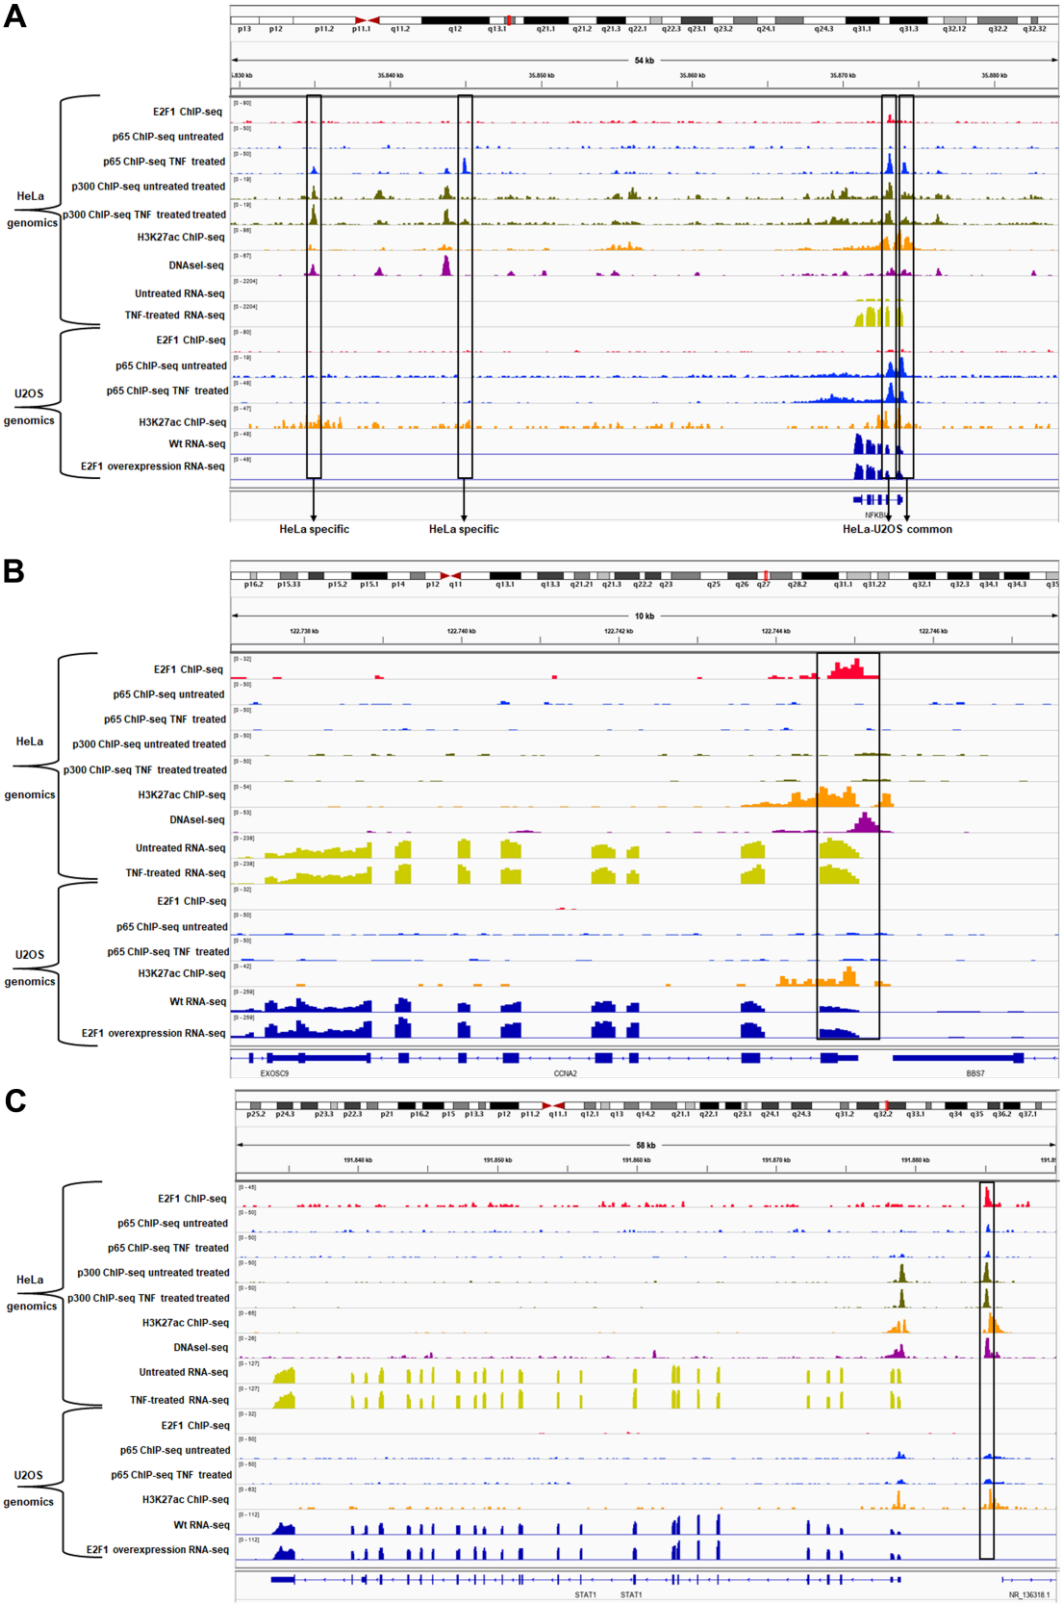

D

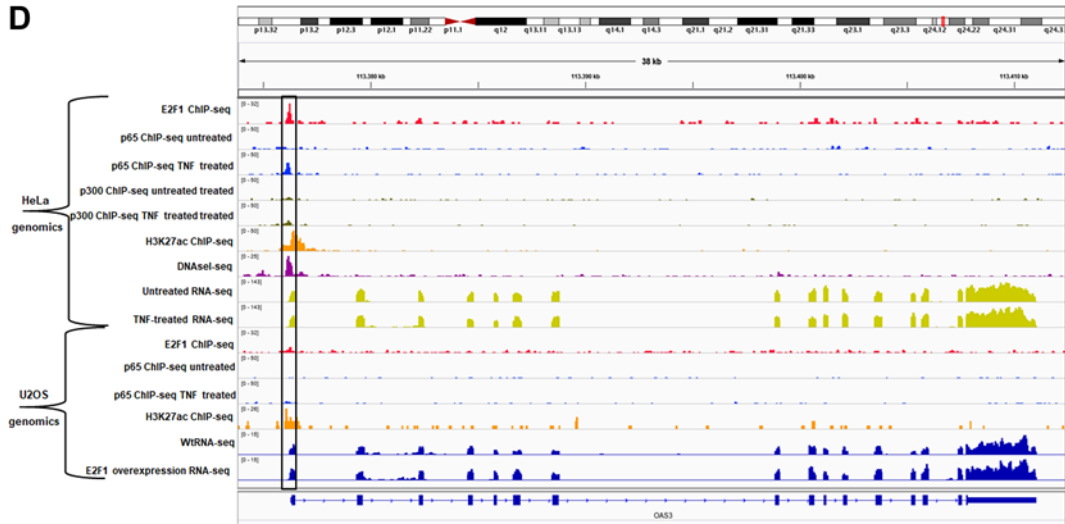

E

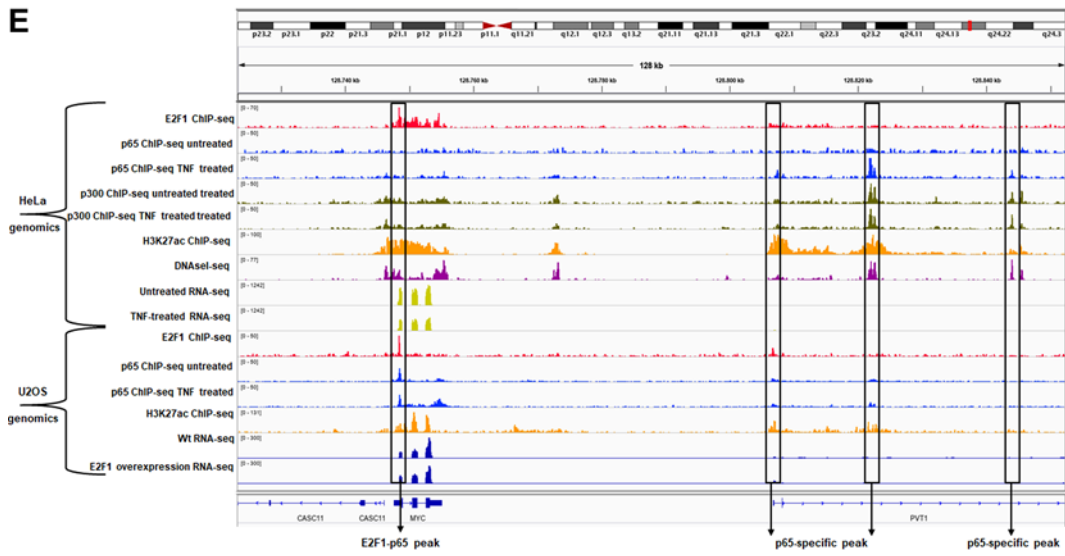

**Figure S2:** (A) Venn plots depicting the common E2F1-p65, the E2F1-specific and the p65-specific binding regions in U2OS cells. (B, C, D) Aggregate plots (up) and heatmaps (down) illustrating the signal distribution for E2F1, p65 and H3K27ac around the E2F1-specific, the common E2F1-p65 and the p65-specific binding regions respectively

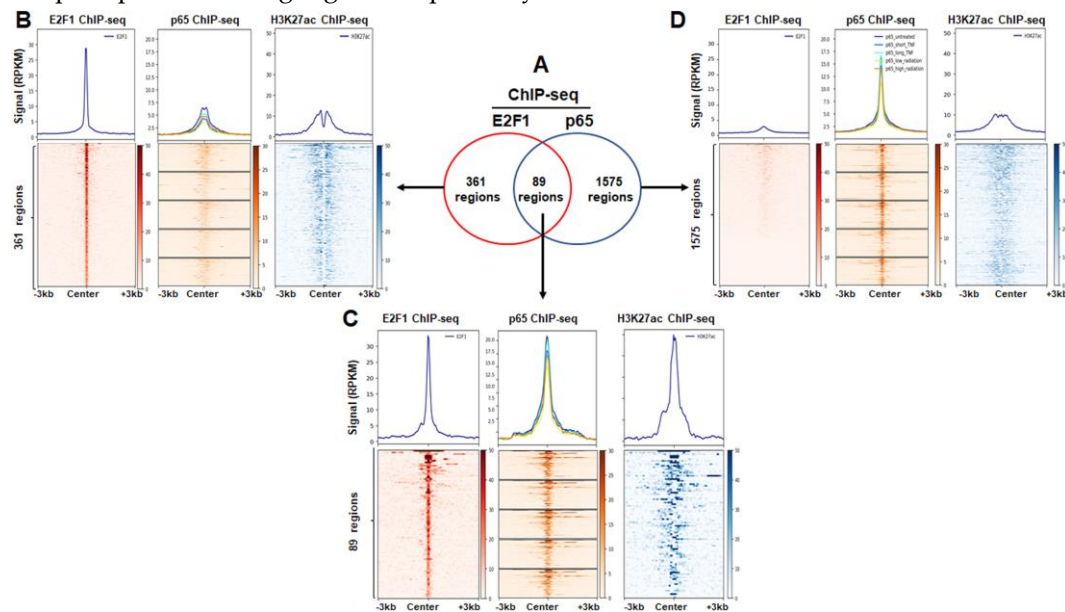

**Figure S3:** (A, B, C) Figure panels depict the genomic distribution of E2F1-specific, E2F1-p65 common and p65-specific peaks respectively in U2OS cells. D and E show the top motif for E2F1-specific and p65-specific peaks respectively. (F, G, H) Figure panels illustrate the top biological processes for E2F1-specific, E2F1-p65 common and p65-specific peaks respectively

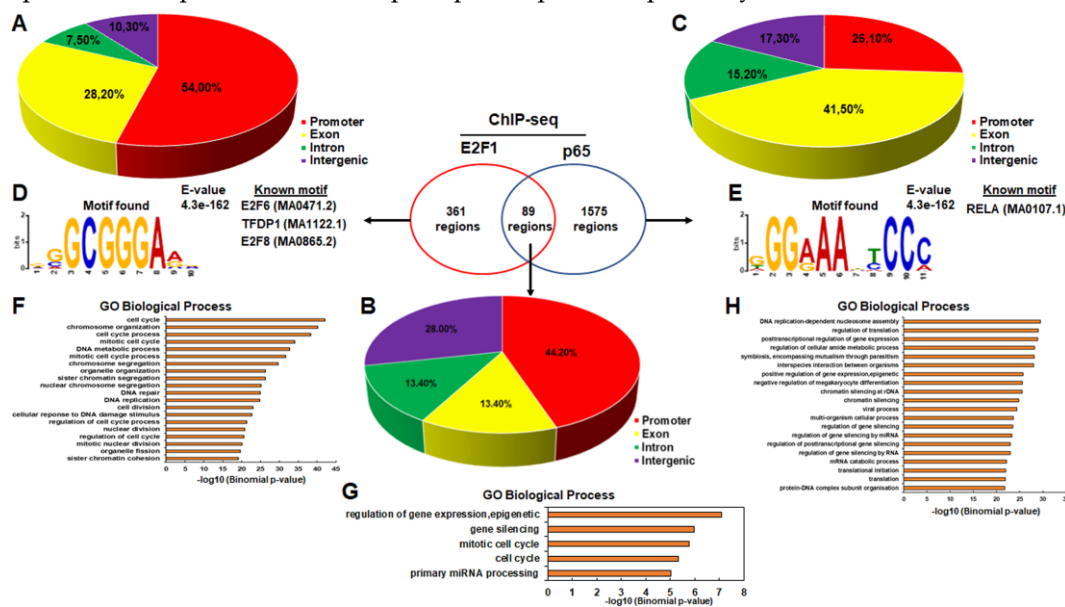

Supplement: s1 [file s1]
